# Supplementary material
Source: HighWire-hosted journal article supplement (https://bmjopen.bmj.com/content/10/7/e038107)
Supplement: inline-supplementary-material-1 [file inline-supplementary-material-1.pdf]

## Consentimiento informado para estudio científico de investigación

Título del Proyecto *Coste-utilidad y efectos fisiológicos de la Terapia de Aceptación y Compromiso y la Activación Conductual en pacientes con dolor crónico y depresión mayor comórbida (Proyecto IMPACT)*

Nombre *Haz clic aquí para escribir el nombre* Apellidos *Haz clic aquí para escribir los apellidos*

Nº. HC *Número historia clínica* Edad *\_\_\_\_\_ años* DNI *número DNI*

Nombre *Haz clic aquí para escribir el nombre* Apellidos *Haz clic aquí para escribir los apellidos*

Edad *\_\_\_\_\_ años* DNI *número DNI*

En calidad de\* *escribir familiar del/de la paciente o representante legal*

\*Familiar o allegado/a del/de la paciente, representante legal.

\*El orden de la relación para la autorización es el siguiente: paciente, cónyuge, padres, hijos/as, hermanos/as, familiares o personas allegadas y tutores/oras.

**DECLARO:** *que el doctor/la doctora - haz clic aquí para escribir el nombre* colegiado/a número *haz clic aquí para escribir el número* me ha propuesto participar en el estudio de investigación *Título del Proyecto* y tras recibir la información correspondiente, manifiesto que:

1. He recibido la hoja informativa y he comprendido la información sobre el estudio en el que participaré.
2. He sido informado/a de las implicaciones derivadas de la participación.
3. Soy consciente de que mi participación es voluntaria y puedo retirarme en el momento que decida sin tener que dar explicaciones y sin que repercuta en mi atención.
4. He sido informado/a del tratamiento de datos del Parc Sanitari Sant Joan de Déu (PSSJD), de sus plazos de conservación y de su utilización para investigación por parte del investigador/a principal del proyecto y que en cualquier momento puedo ejercer mis derechos de Acceso, Rectificación, Supresión/Cancelación y Oposición en los términos y condiciones establecidos por la normativa vigente en materia de Protección de Datos [Ley Orgánica 3/2018, de 5 de diciembre, de Protección de Datos Personales y Garantía de los Derechos Digitales (LOPDGDD)], como por ejemplo solicitar mis datos personales, rectificarlos si fuera necesario, así como revocar en cualquier momento la autorización de inclusión en el estudio. Para ejercer estos derechos hay que dirigirse, personalmente o por escrito, al Investigador/a principal o a la Unidad de Atención al Usuario del centro, indicando claramente la petición, refiriéndose a este estudio y adjuntando copia de documento identificativo (DNI/NIE). Dirección del Centro: Parc Sanitari Sant Joan de Déu, Dr. Antoni Pujadas 42, 08830 Sant Boi de Llobregat. Responsable de Tratamiento: PSSJD. En caso de disconformidad con el tratamiento de los datos o con el ejercicio de los derechos correspondientes puedo dirigirme por escrito al Delegado de Protección de Datos de PSSJD (oficina\_dpd@pssjd.org) a la dirección previamente indicada o reclamar directamente ante las Autoridades de Control (Autoridad Catalana de Protección de Datos o la Agencia Española de Protección de Datos). Este documento y los datos recogidos en el estudio se conservarán bajo la custodia de PSSJD por un periodo no inferior a 10 años.

He entendido las explicaciones que me han facilitado en un lenguaje claro y sencillo y el/la investigador/a que me ha atendido me ha permitido realizar todas las observaciones y me ha aclarado todas las dudas que he planteado.

Y en tales condiciones,

SI

NO

**DOY MI CONSENTIMIENTO** para participar en el estudio de investigación *Coste-utilidad y efectos fisiológicos de la Terapia de Aceptación y Compromiso y la Activación Conductual en pacientes con dolor crónico y depresión mayor comórbida (Proyecto IMPACT)*

Sant Boi de Llobregat, a *Haz clic aquí para escribir la fecha*

Firma del/de la paciente  
DNI

Firma del/de la representante/tutor/a  
DNI

Firma del/de la investigador/a  
y nº colegiado/a
